# Supplementary material
Source: publisher figshare collection journal article supplement (https://karger.figshare.com/ndownloader/files/22726805)
Supplement: Supplementary file 1 [file 22726805]

**Supplementary Table S2**

| **Primer Exon** | **Sequence** |
| --- | --- |
| TRPC4AP_Ex1F | 5‘-CTC TTT TCC CAC CTA CCC CG-3‘ |
| TRPC4AP_Ex1R | 5‘-AAG GGA CAT CAA GCC AGC TG-3‘ |
| TRPC4AP_Ex2F | 5‘-TTT GGA AGT CGG CTG CTC TC-3‘ |
| TRPC4AP_Ex2R | 5‘-ACC TCC CAA AAT TAA GCA AGC AC-3‘ |
| TRPC4AP_Ex3F | 5‘-TGT GGT TCA TTG GGG ACT GT-3‘ |
| TRPC4AP_Ex3R | 5‘-GCT TCA ACA TGT AAA TGC CGC-3‘ |
| TRPC4AP_Ex4F | 5‘-GAC TTG CTG CAG TCAG GAG CC-3‘ |
| TRPC4AP_Ex4R | 5‘-GCT GCT TAG CTG GGG GAG GAG-3‘ |
| TRPC4AP_Ex5F | 5‘-AGG TTC TGA TGG GCA CTA TGA-3‘ |
| TRPC4AP_Ex5R | 5‘-TCC CAT CTT AAA CAT TGC AGA CC-3‘ |
| TRPC4AP_Ex6F | 5‘-CAT GCC AGT TTT CAG AGG TGA-3‘ |
| TRPC4AP_Ex6R | 5‘-TGA GAA TCC AAT GGT CTG AGA C-3‘ |
| TRPC4AP_Ex7F | 5‘-AAG GGG ATG CGA AAG AGA GG-3‘ |
| TRPC4AP_Ex7R | 5‘-GCC TGG GTG ACA TAG TGA CG-3‘ |
| TRPC4AP_Ex8F | 5‘-TGC AGA TTG TTT GTT AGG GCT-3‘ |
| TRPC4AP_Ex8R | 5‘-TGA GGA CAA TTC TAC TCT GAG CA-3‘ |
| TRPC4AP_Ex9F | 5‘-TGT TCA GAG CAG GTT CGA GG-3‘ |
| TRPC4AP_Ex9R | 5‘-TAA CAG AAG GCC CAG TGG AG-3‘ |
| TRPC4AP_Ex10F | 5‘-TGG CCC TCC TTA CTG ACA GT-3‘ |
| TRPC4AP_Ex10R | 5‘-AAG GTC AAA GGG TCA GCA GC-3‘ |
| TRPC4AP_Ex11F | 5‘-GGT ACA TGA GGA CAG AGG CT-3‘ |
| TRPC4AP_Ex11R | 5‘-GGG GTG GCT ATG AGG GTT AG-3‘ |
| TRPC4AP_Ex12F | 5‘-ACA GGA AGT GGG CAG GAG A-3‘ |
| TRPC4AP_Ex12R | 5‘-CGT GCA TAC CTG GAT GTG CT-3‘ |
| TRPC4AP_Ex13. 2_F | 5‘-AGA TGT GGT GGG AAT GCA CT-3‘ |
| TRPC4AP_EX13.2_R | 5‘-TGA ATG CTC GGT CAC TGT GG-3‘ |
| TRPC4AP_14F | 5‘-ATG AAC TGT TTG GGG CTC AG-3‘ |
| TRPC4AP_14R | 5‘-ACC CCT TGG AGA ACT GAA CA-3‘ |
| TRPC4AP_Ex15.2_F | 5‘-CCC CAG GAT GCT TGC TCA AA-3‘ |
| TRPC4AP_Ex15.2_R | 5‘-CCA GAC AGA GCA GGT TCC AA-3‘ |
| TRPC4AP_Ex16_F | 5‘-AGT GCC TCT TAG TAC CTG GGT-3‘ |
| TRPC4AP_Ex16_R | 5‘-GTG CAG CTC CCT CAG TCA TT-3‘ |
| TRPC4AP_Ex17F | 5‘-CTA GCT TCA GAG TCA GGA CCC-3 |
| TRPC4AP_Ex17R | 5‘-TCC TTA GGC CCT GTC TGT ACA-3‘ |
| TRPC4AP_Ex18Ex19F | 5‘-ACT CTC CTC CCT GCC TGA TG-3‘ |
| TRPC4AP_Ex18Ex19R | 5‘-CCA CCA AGC CTG TAC CCA AA-3 |
